# Supplementary material
Source: PubMed Central journal article supplement (PMC9628943)
Supplement: mmc1.pdf [file mmc1.pdf]

# THE LANCET Infectious Diseases

## Supplementary webappendix

This webappendix formed part of the original submission and has been peer reviewed. We post it as supplied by the authors.

Supplement to: Yinka-Ogunleye A, Aruna O, Dalhat M, et al, for the CDC Monkeypox Outbreak Team. Outbreak of human monkeypox in Nigeria in 2017–18: a clinical and epidemiological report. *Lancet Infect Dis* 2019; published online July 5. [http://dx.doi.org/10.1016/S1473-3099\(19\)30294-4](http://dx.doi.org/10.1016/S1473-3099(19)30294-4).

**APPENDIX 1: Monkeypox case investigation form**

( This form was modified in the course of the outbreak)

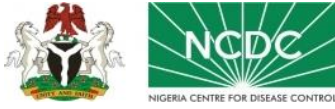

**Nigeria Monkeypox Case Investigation form**

|                                    |
|------------------------------------|
| Epid number:                       |
| Date of investigation: ___/___/___ |

Case reported by *name* \_\_\_\_\_

*Title* \_\_\_\_\_

*Phone No* \_\_\_\_\_

**Section 2: Patient identity**

1. Last Name \_\_\_\_\_ First Name \_\_\_\_\_

2. For children, father's name \_\_\_\_\_

3. Date of birth \_\_\_/\_\_\_/\_\_\_

4. Age (years) \_\_\_\_\_

5. Gender  M  F

6. Village/settlement/street of residence during the last 6 months \_\_\_\_\_

7. State \_\_\_\_\_ LGA \_\_\_\_\_ WARD \_\_\_\_\_

8. Nationality \_\_\_\_\_ Ethnicity / tribe \_\_\_\_\_

9. Occupation of the patient \_\_\_\_\_

\_\_\_\_\_

**Section 2: Patient status**

10. Status of the patient:  Alive  Dead
11. If dead, date of death \_\_\_/\_\_\_/\_\_\_ Place of death: \_\_\_\_\_
12. Place of the funeral, name village: \_\_\_\_\_ LGA \_\_\_\_\_ state \_\_\_\_\_
13. Is a smallpox vaccination scar present?  Yes  No  Do not know
- 

**Section 3: Clinical history/Presentation**

14. Date of onset of symptoms: \_\_\_/\_\_\_/\_\_\_
15. Name of the village where the patient got ill \_\_\_\_\_ Country \_\_\_\_\_
16. a. Did the patient travel anytime in the three weeks before becoming ill:  Yes  No  DNK
- b. If Yes, indicate the places \_\_\_ (1) \_\_\_\_\_ (2) \_\_\_\_\_
17. a. Did the patient travel during illness :  Yes  No  DNK
- b. If Yes, indicate the places \_\_\_(1) \_\_\_\_\_(2) \_\_\_\_\_
18. Does the patient have a cutaneous eruption?  Yes  No  DNK.
19. If yes, date of onset for the rash: \_\_\_/\_\_\_/\_\_\_
20. Did the patient have fever?  Yes  No  DNK. If yes, date of onset for the fever: \_\_\_/\_\_\_/\_\_\_
21. If there is active disease,
- a. Are the lesions in the same state of development on the body?  Yes  No  Do not know
- b. Are all of the lesions the same size and state of development?  Yes  No  Do not know
- c. Are the lesions deep and profound?  Yes  No  Do not know
22. Localisation of the lesions.  Face  Legs  Soles of the feet  Palms of the hands
- Thorax  Arms  Genitals  All over the body

23. Do the lesions resemble (for each photo):

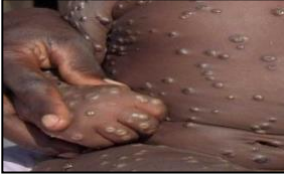

a.  Yes  No

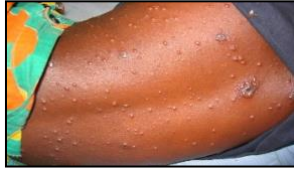

b.  Yes  No

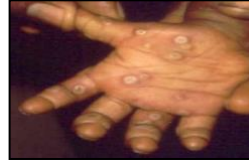

c.  Yes  No

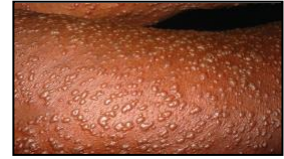

d.  Yes  No

24. Does or did the patient have any of the following symptoms (check all that apply)

- |                             |                              |                             |                              |                           |                              |                             |                              |
|-----------------------------|------------------------------|-----------------------------|------------------------------|---------------------------|------------------------------|-----------------------------|------------------------------|
| Vomiting/nausea             | <input type="checkbox"/> Yes | <input type="checkbox"/> No | <input type="checkbox"/> DNK | Headache                  | <input type="checkbox"/> Yes | <input type="checkbox"/> No | <input type="checkbox"/> DNK |
| Cough                       | <input type="checkbox"/> Yes | <input type="checkbox"/> No | <input type="checkbox"/> DNK | Lesions that itch         | <input type="checkbox"/> Yes | <input type="checkbox"/> No | <input type="checkbox"/> DNK |
| Lymphadenopathy, inguinal   | <input type="checkbox"/> Yes | <input type="checkbox"/> No | <input type="checkbox"/> DNK | Muscle pain (myalgie)     | <input type="checkbox"/> Yes | <input type="checkbox"/> No | <input type="checkbox"/> DNK |
| Lymphadenopathy, axillary   | <input type="checkbox"/> Yes | <input type="checkbox"/> No | <input type="checkbox"/> DNK | Fatigue                   | <input type="checkbox"/> Yes | <input type="checkbox"/> No | <input type="checkbox"/> DNK |
| Lymphadenopathy, cervical   | <input type="checkbox"/> Yes | <input type="checkbox"/> No | <input type="checkbox"/> DNK | Conjunctivitis            | <input type="checkbox"/> Yes | <input type="checkbox"/> No | <input type="checkbox"/> DNK |
| Chills or sweats            | <input type="checkbox"/> Yes | <input type="checkbox"/> No | <input type="checkbox"/> DNK | Sensitivity to light      | <input type="checkbox"/> Yes | <input type="checkbox"/> No | <input type="checkbox"/> DNK |
| Sore throat when swallowing | <input type="checkbox"/> Yes | <input type="checkbox"/> No | <input type="checkbox"/> DNK | Is the patient bedridden? | <input type="checkbox"/> Yes | <input type="checkbox"/> No | <input type="checkbox"/> DNK |
| Oral ulcers                 | <input type="checkbox"/> Yes | <input type="checkbox"/> No | <input type="checkbox"/> DNK |                           |                              |                             |                              |

**Section 4: Exposures**

25. During the three weeks preceding the onset of symptoms, did the patient have contact with one or more persons who had with similar symptoms?  Yes  No  Do not know

If Yes, respond to the following questions concerning these additional ill people (indicate all of the ill people). There is additional space for multiple contacts at the end of this form.

26. Last name \_\_\_\_\_ First name \_\_\_\_\_

27. Relationship with the patient \_\_\_\_\_

28. First date of contact with the ill person \_\_\_/\_\_\_/\_\_\_

29. Did the patient touch a domestic or wild animal during the three weeks preceding symptom onset?

Yes       No       Do not know

30. If Yes, what kind of animal \_\_\_\_\_

31. Date of contact \_\_\_/\_\_\_/\_\_\_

32. Type of contact (*check all that apply*)

Rodents alive in the house                       Dead animal found in the forest  
 Alive animal living in the forest                       Animal bought for meat

---

### Section 5: Laboratory

33. Was a specimen collected?  Yes       No      35. If Yes, date \_\_\_/\_\_\_/\_\_\_

34. Type:  Crust     Swab     Blood

Collect at least two types of specimens from each patient. For each specimen: place a label on this form and a label on the specimen tube. Ensure that the two labels have the same name/number of the

### Section 6: Update on the Hospital information

35. Was the patient sent to a hospital?                       Yes     No

36. Was the patient admitted in the isolation ward?                       Yes     No

37. If Yes, name of Hospital \_\_\_\_\_ Hospitalization date \_\_\_/\_\_\_/\_\_\_

38. Date of discharge \_\_\_/\_\_\_/\_\_\_ OR Date of death \_\_\_/\_\_\_/\_\_\_

### Section 7: Medical History (Please provide information on the

39. If female, Pregnancy status:                       Pregnant       Not pregnant

40. HIV status:                       Negative       Positive       Unknown

41. Any other known medical condition (Please state)

.....

.....

**Section 8: Additional contacts of the patient**

| Full Name | Location/Address | Sex | Relationship | Type of contact e.g. touch, breastfeeding, sexual |
|-----------|------------------|-----|--------------|---------------------------------------------------|
|           |                  |     |              |                                                   |
|           |                  |     |              |                                                   |
|           |                  |     |              |                                                   |
|           |                  |     |              |                                                   |
|           |                  |     |              |                                                   |

## Appendix 2

### MONKEYPOX SPECIMEN PROCESSING:

We cut swab tips obtained from lesions into 2.0mL microcentrifuge tubes and hydrated these with 400uL of phosphate buffered saline (PBS). Hydrated swabs were incubated for 10 minutes at room temperature before a brief 1-minute centrifugation in a swab extraction tube system (Roche Diagnostics, Indianapolis, IN) to collect the eluate for DNA extraction. One crust was placed in a 2.0mL microcentrifuge tube with 300uL of PBS and thoroughly homogenized using a sterile, disposable pestle until cloudy in appearance. Homogenates were incubated for 10 minutes at room temperature prior to DNA extraction.

We vortexed serum specimens and used a 100uL aliquot directly for DNA extraction, using the EZ1 Advanced DNA Tissue Kit and EZ1 Advanced instrument (Qiagen N.V.; Germantown, MD) in U.S. CDC laboratories (Atlanta, GA) or manually with the QIAmp DNA Mini Kit (Qiagen N.V.; Germantown, MD) at the NCDC National Reference Laboratory (Gaduwa, Abuja, Nigeria). US-CDC and NCDC laboratories conducted real time PCR for MPX and VZV using a West African monkeypox virus specific (MPXV-WA) real-time PCR assay based on TaqMan® chemistry and technology<sup>21</sup>. The assay was performed in duplicate at a final volume of 20uL containing 6.5uL of RNase/DNase free water (Clontech, Mountain View, CA), on the 7500 Fast Real-Time PCR Instrument (Life Technologies, Grand Island, NY)<sup>15</sup>. Real-time PCR assay specific for VZV was used for Chickenpox testing<sup>17</sup>.

We performed Enzyme-linked immunosorbent assays (ELISAs) of anti-OPXV antibodies as previously described.<sup>16</sup> Sera were tested by IgM ELISA at 1:50 dilution and by IgG ELISA at 1:100 dilution to detect antibodies purified VACV Vaccinia virus. Cutoff values (COVs) were determined based on the mean optical density (OD) plus 3 standard deviations for five negative control sera. Resulting OD minus COV (OD-COV) values determined if a sample was positive (>0.0 OD-COV) or negative (<0.0 OD-COV) for presence of anti-OPXV antibodies.

We utilized a targeted hybridization protocol to enrich MPXV DNA from the clinical samples, with the captured MPXV DNA amplified and sequenced using the Illumina MiSeq benchtop system. Whole genome sequences for seven MPXV positive cases from Rivers State were generated and assembled following published protocols.<sup>18</sup> Given the high number of cases and variable epidemiological linkages identified in Rivers State, these seven outbreak samples (selected based on geographic information and quality of epidemiological data) were selected for haplotype analysis along with four references of WA MPXV
